# Supplementary material for: Synthesis and antitumor effects of novel benzyl naphthyl sulfoxide/sulfone derivatives derived from Rigosertib
Source: Royal Society of Chemistry journal article supplement (doi:10.1039/d1ra05226h), 2021-01-01
Supplement: d1ra05226h1.pdf [file d1ra05226h1.pdf]

## Synthesis and antitumor effects of novel benzyl naphthyl sulfoxide/sulfone derivatives modified from Rigosertib

Lin Tang<sup>a</sup>, Tingting Chen<sup>a</sup>, Hongpeng Yang<sup>a,b</sup>, Xiaoxue Wen<sup>a</sup>, Yunbo Sun<sup>a</sup>, Shuchen Liu<sup>a</sup>,

Tao Peng<sup>a,\*</sup>, Shouguo Zhang<sup>a,\*</sup>, Lin Wang<sup>a,b,\*</sup>

<sup>a</sup> Beijing Institute of Radiation Medicine, Beijing 100850, P.R. China

<sup>b</sup> Faculty of Environment & Life, Beijing University of Technology, Beijing 100124, P.R. China

\*Corresponding authors. Tel.: +86 010 66932239

E-mail addresses: [wanglin@bmi.ac.cn](mailto:wanglin@bmi.ac.cn) or [wanglin07@sina.com](mailto:wanglin07@sina.com) (Lin Wang);

[zhangshouguo1409@sina.com](mailto:zhangshouguo1409@sina.com) (Shouguo Zhang); [pengtao@bmi.ac.cn](mailto:pengtao@bmi.ac.cn) (Tao Peng).

### Supporting Information

#### 1. Synthetic procedures of the intermediates

##### 1.1. 6-bromo-2-naphthol (2)

To a solution of 2-naphthol (20.10g, 140mmol) in acetic acid (60mL) was added Br<sub>2</sub> (14mL) in acetic acid (14mL). The reaction mixture was refluxed for 3h, during which three portions of Sn (2×3.56g, 2×0.03mol and 14.56g, 0.12mol) were added. Then, the mixture was cooled to 50°C, and the formed Sn salts were filtered and discarded. The remaining solution was poured into cold water (400mL) where the product precipitated as pink powders. Obtained in 92.9% yield, pink solid, m.p. 125~127°C. <sup>1</sup>H-NMR (400 MHz, CDCl<sub>3</sub>) δ (ppm): 7.92 (s, 1H), 7.67 (d, *J* = 9.6 Hz, 1H), 7.56 (d, *J* = 8.8Hz, 1H), 7.49 (d, *J* = 8.9 Hz, 1H), 7.12 (s, 2H), 5.03 (s, 1H, OH).

##### 1.2. 6-O-(2-bromonaphthyl)-dimethylthiocarbamate (3)

The previously prepared 6-bromo-2-naphthol (500mg, 2.24mmol) was dissolved in DMF (10mL) and added to a solution of sodium hydride (55% moistened with oil, 193 mg, 6.72mmol) in DMF (8mL) at 0°C. The ice bath was taken away and the mixture was stirred for 30 min. Then dimethyl carbamoyl chloride (830mg, 6.72mmol) was added and it was stirred for 2h at 80°C and 15h at room temperature. The reaction mixture was then extracted with 1% aqueous NaOH (100mL) and TBME (100mL). The aqueous phase was washed with TBME (2×50mL). The combined organic phases were washed with brine and 5% aqueous HCl (100mL), dried over anhydrous Na<sub>2</sub>SO<sub>4</sub> and the solvents was evaporated. The crude was purified by column chromatography to give the product. Obtained in 46.6% yield, colorless

solid, m.p. 129~131°C. <sup>1</sup>H-NMR (400 MHz, CDCl<sub>3</sub>) δ (ppm): 8.01 (d, *J* = 1.6 Hz, 1H), 7.76 (d, *J* = 8.9 Hz, 1H), 7.67 (d, *J* = 8.7 Hz, 1H), 7.55 (dd, *J* = 8.8, 2.0 Hz, 1H), 7.47 (d, *J* = 2.2 Hz, 1H), 7.26 (dd, *J* = 9.0, 2.3 Hz, 1H), 3.49 (s, 3H), 3.40 (s, 3H).

### 1.3. 6-*S*-(2-bromonaphthyl)-dimethylthiocarbamate (**4**)

The compound **3** (3.21g, 10.35mmol) prepared in the previous step was melted and kept at 220°C for 6h and the product was purified by column chromatography, eluting with DCM. After recrystallization in methanol, the product was obtained as yellow crystals. Obtained in 63.9% yield, yellow solid, m.p. 112~114°C. <sup>1</sup>H-NMR (400 MHz, CDCl<sub>3</sub>) δ (ppm): 8.03-7.96 (m, 2H), 7.75 (d, *J* = 8.6 Hz, 1H), 7.68 (d, *J* = 8.7 Hz, 1H), 7.59–7.53 (m, 2H), 3.12 (s, 3H), 3.05 (s, 3H).

### 1.4. 6-bromonaphthalene-2-thiol (**5b**)

A solution of the **4** (3.48g, 11.2mmol) in MeOH (250mL) was saturated with Ar. Then solid KOH (5.22 g, 93.0mmol) was added and the mixture was heated to 80°C for 2.5h. The reaction mixture was then quenched with 1M aqueous HCl (250mL) at 0°C and it was extracted with DCM (300mL). The aqueous phase was washed with DCM (2×100mL). The combined organic phases were washed with brine, dried over anhydrous Na<sub>2</sub>SO<sub>4</sub> and the solvents was evaporated to give the product. Obtained in 89.2% yield, beige solid, m.p. 160~162°C. <sup>1</sup>H-NMR (400 MHz, CDCl<sub>3</sub>) δ (ppm): 7.93 (s, 1H), 7.70 (s, 1H), 7.62 (d, *J* = 8.6 Hz, 1H), 7.56 (d, *J* = 8.8 Hz, 1H), 7.52 (d, *J* = 8.8 Hz, 1H), 7.35 (d, *J* = 8.5 Hz, 1H), 3.60 (s, 1H).

### 1.5. 4-methoxy-3-nitrobenzaldehyde (**7**)

To an ice cold solution of 70% HNO<sub>3</sub> (50mL) was added anisic aldehyde (5.40g, 40.0mmol) dropwise, then the mixture was stirred at room temperature for 2h. The mixture was poured into ice water, the formed white precipitate was filtered, washed with water and dried under vacuum to get the product. Obtained in 90.1% yield, white solid, m.p. 99~101°C. <sup>1</sup>H-NMR (400 MHz, DMSO-*d*<sub>6</sub>) δ (ppm): 9.95 (s, 1H), 8.43 (s, 1H), 8.20 (d, *J*=8.0 Hz, 1H), 7.58 (d, *J*=8.0 Hz, 1H), 4.06 (s, 4H).

### 1.6. (4-methoxy-3-nitrophenyl)methanol (**8**)

To an ice cold solution of **7** (6.47g, 35.7mmol) in 50mL THF and 10mL EtOH was added sodium borohydride (0.68g, 17.8mmol), then the mixture was stirred at room

temperature for 2h. The mixture was poured into ice water and most of the organic solvents was then evaporated in vacuo. The aqueous phase was extracted with DCM. The organic phase was dried over anhydrous Na<sub>2</sub>SO<sub>4</sub>, and the solvent was evaporated in vacuo to give the product. Obtained in 91.3% yield, pale yellow solid, m.p. 69~70°C. <sup>1</sup>H-NMR (400 MHz, DMSO-*d*<sub>6</sub>) δ (ppm): 7.79 (s, 1H), 7.59 (d, *J*=8.0Hz, 1H), 7.32 (d, *J*=8.0Hz, 1H), 5.34 (t, *J*=6.0Hz, 1H), 4.49 (d, *J*=5.6Hz, 2H), 3.91 (s, 3H).

#### 1.7. 4-(bromomethyl)-1-methoxy-2-nitrobenzene (**9**)

To an ice cold solution of **8** (5.97g, 35.6mmol) in 50mL DCM was added phosphorus tribromide (9.97g, 35.7mmol) dropwise. The mixture was stirred at room temperature for 2h. 100mL of sodium bicarbonate solution was added in the mixture and the stirring was continued for 30 min. The organic phase was washed with sufficient sodium bicarbonate solution and water, dried over anhydrous Na<sub>2</sub>SO<sub>4</sub>, and the solvent was evaporated in vacuo to give the product. Obtained in 98.6% yield, pale green solid, m.p. 110°C. <sup>1</sup>H-NMR (400 MHz, DMSO-*d*<sub>6</sub>) δ (ppm): 8.00 (s, 1H), 7.75 (d, *J*=8.0Hz, 1H), 7.39 (d, *J*=8.0Hz, 1H), 4.81 (s, 2H), 3.94 (s, 3H).

2. Copies of  $^1\text{H-NMR}$  and  $^{13}\text{C-NMR}$  for target compounds (10a, 11a~11d, 12a~12e, 13a~13c, 14b and 15a~15b)

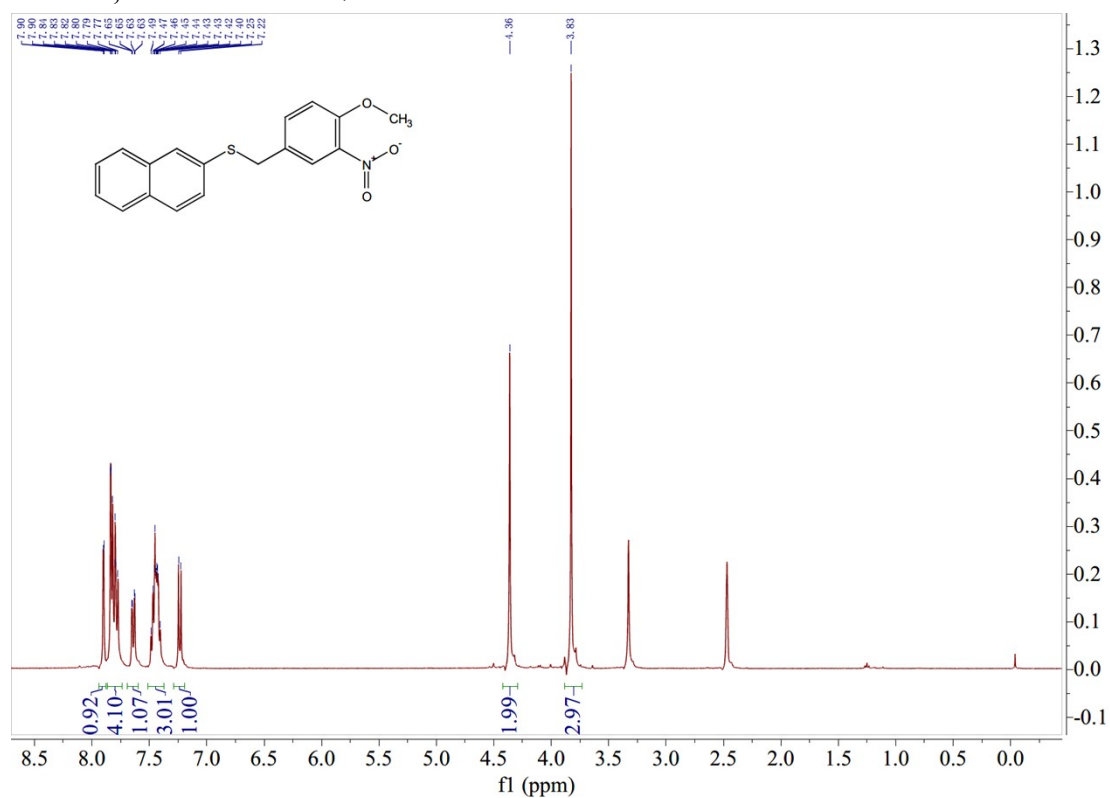

$^1\text{H-NMR}$  of Compound 10a

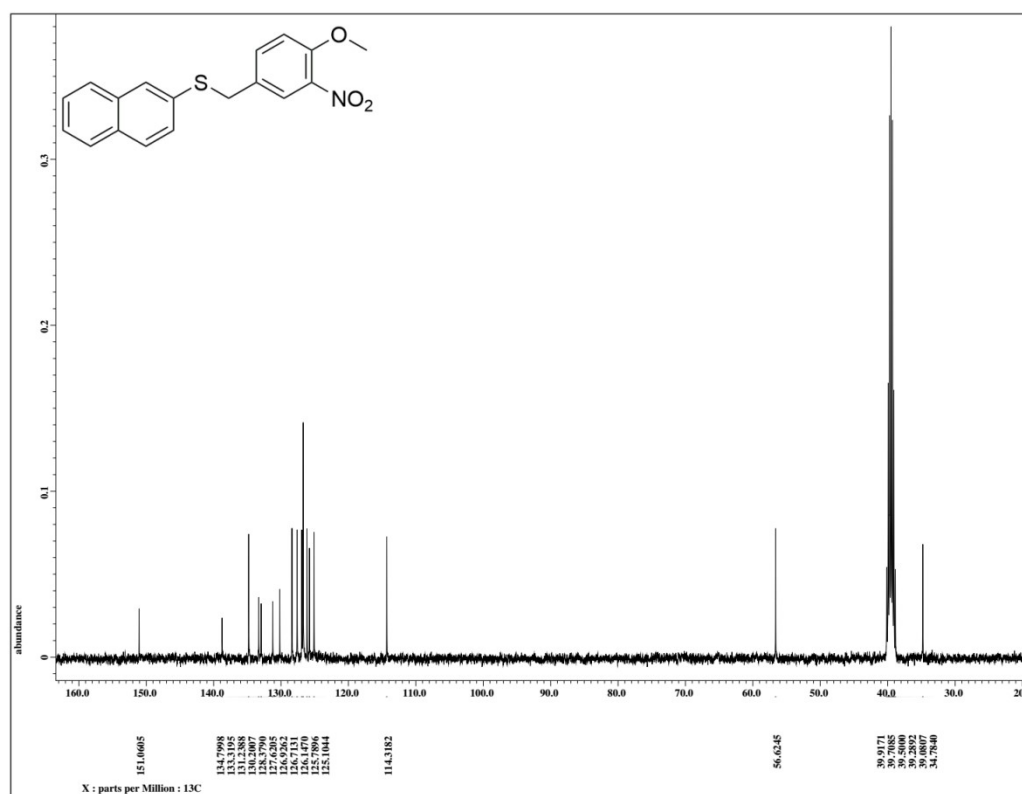

$^{13}\text{C-NMR}$  of Compound 10a

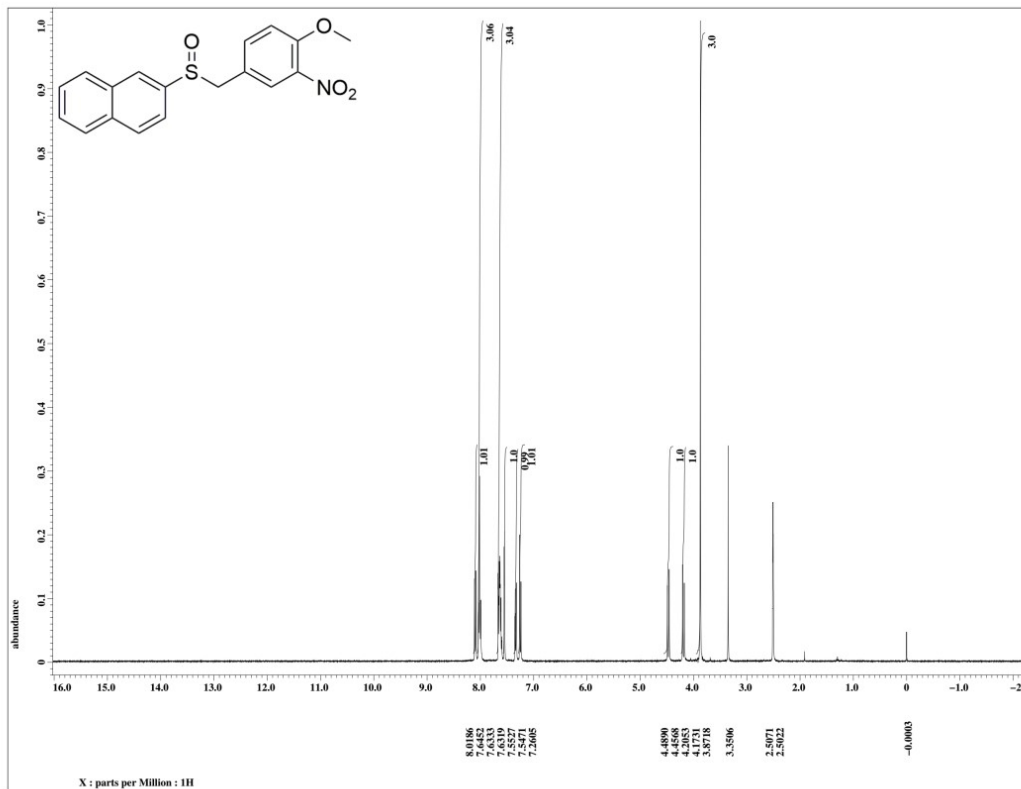

**<sup>1</sup>H-NMR of Compound 11a**

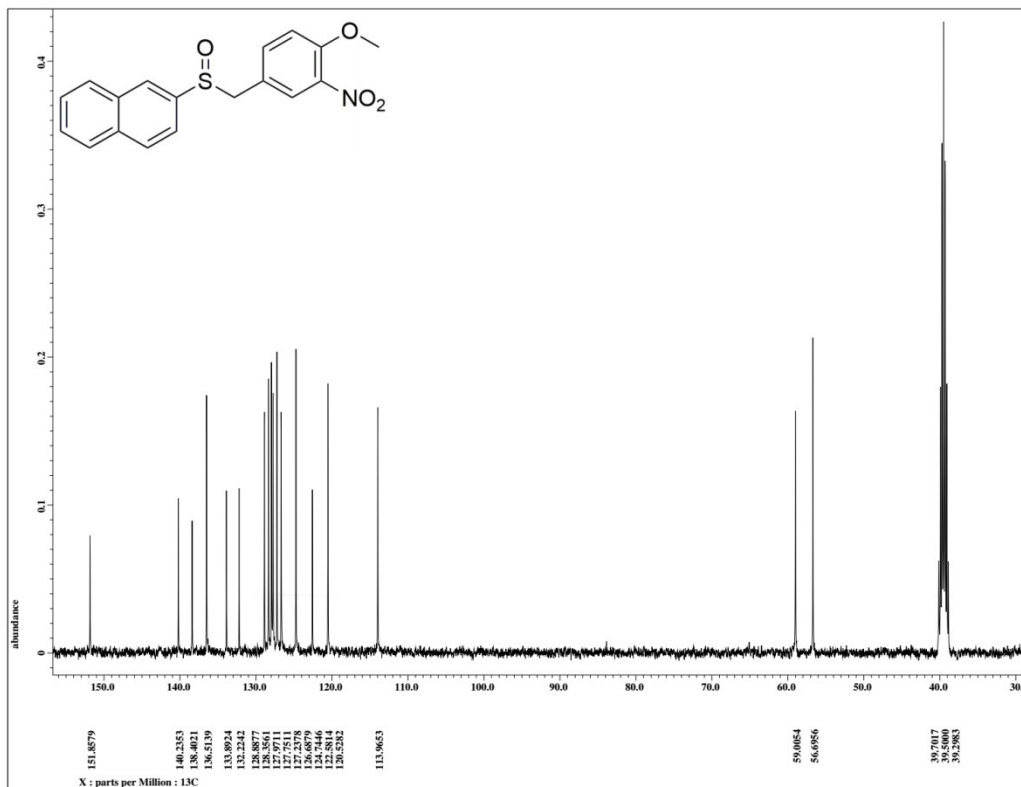

**<sup>13</sup>C-NMR of Compound 11a**

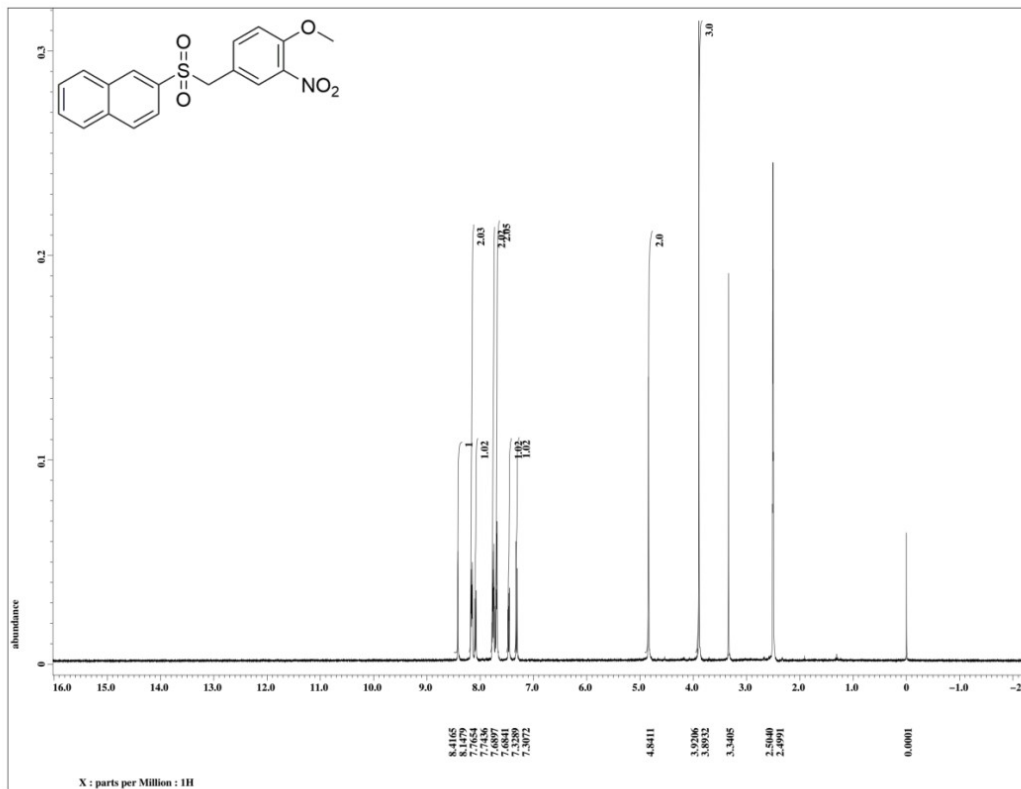

**<sup>1</sup>H-NMR of Compound 11b**

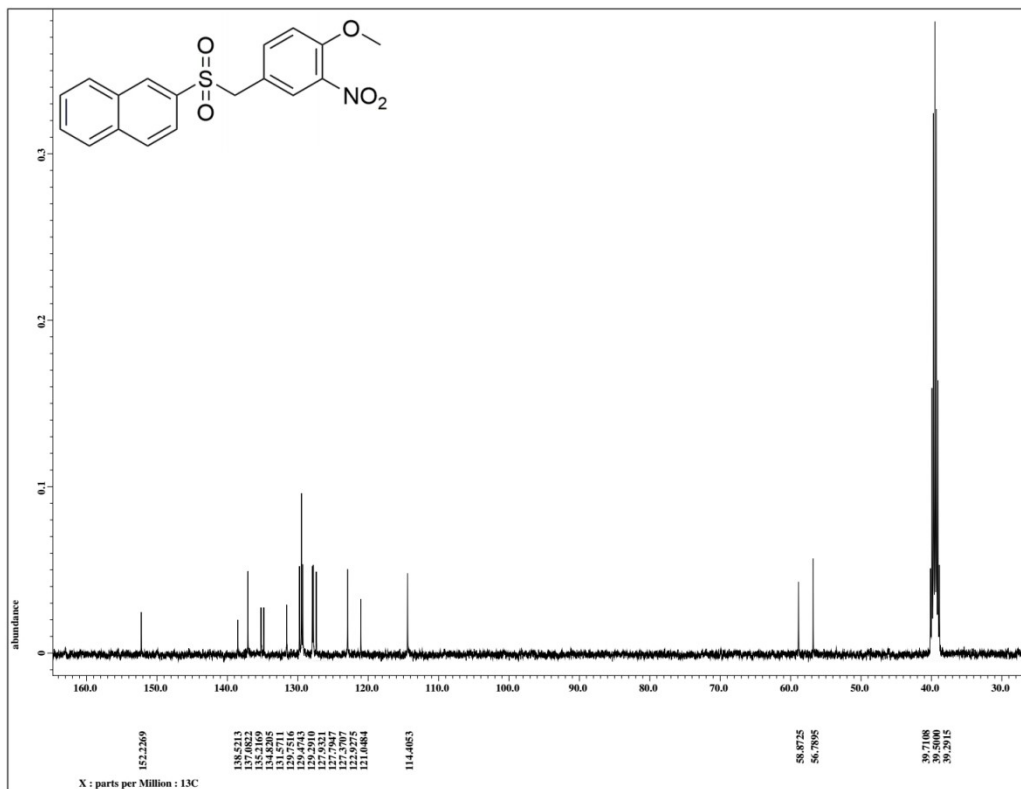

**<sup>13</sup>C-NMR of Compound 11b**

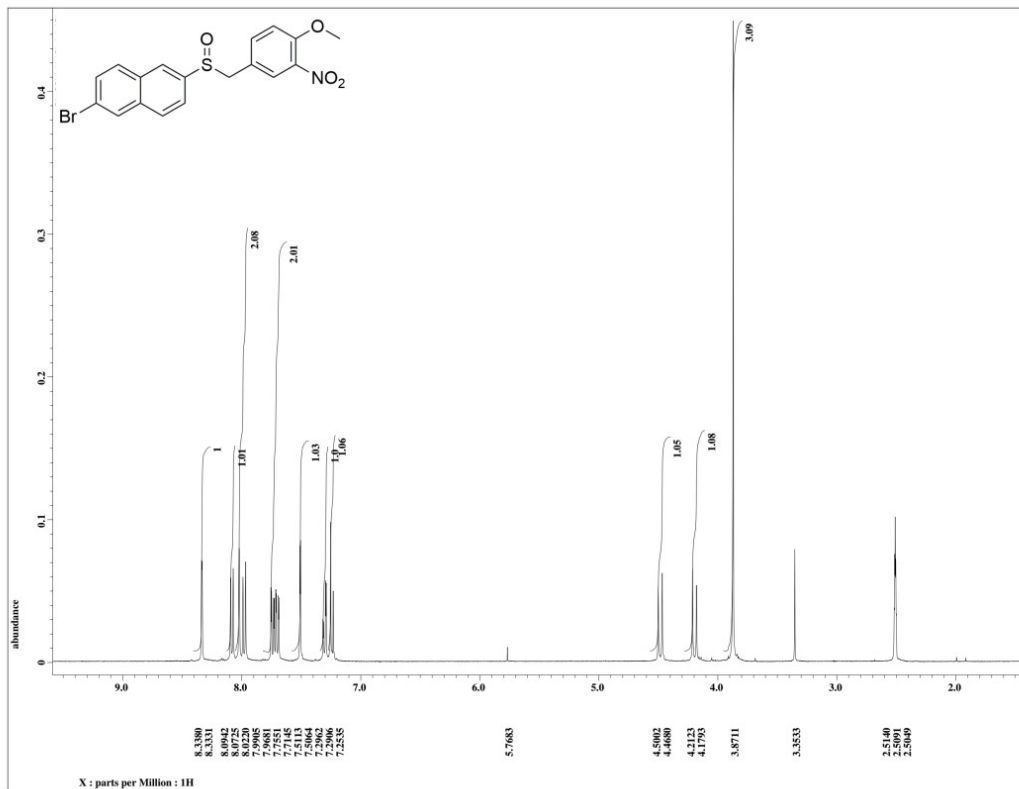

<sup>1</sup>H-NMR of Compound 11c

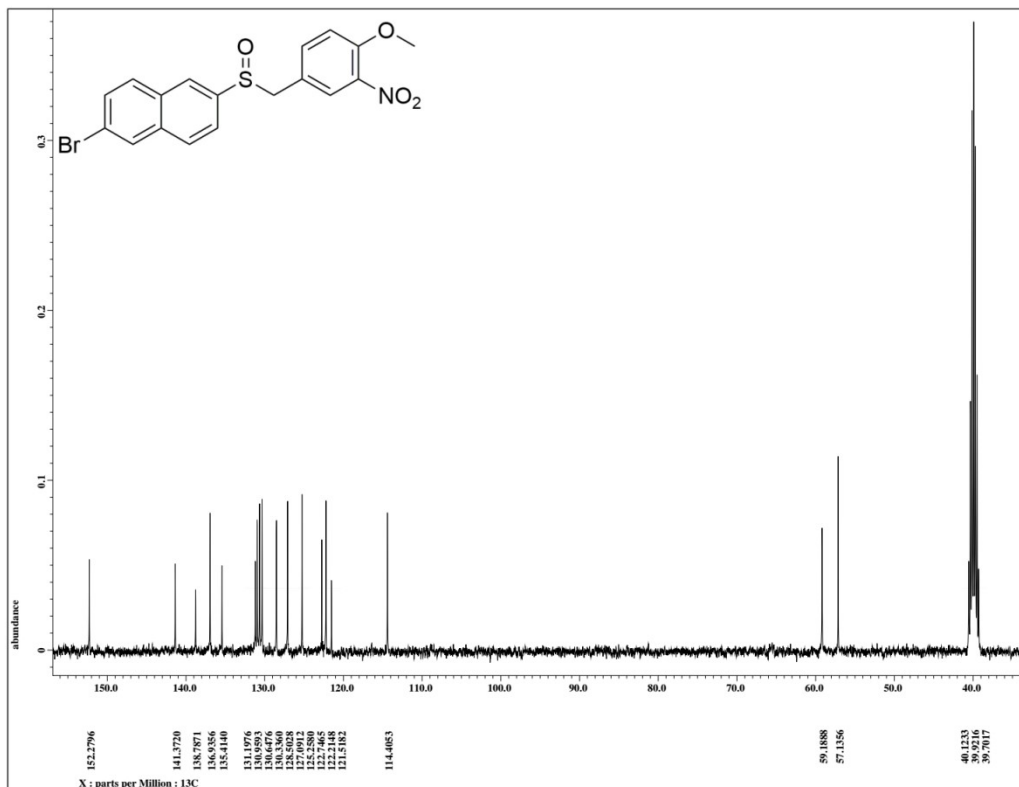

<sup>13</sup>C-NMR of Compound 11c

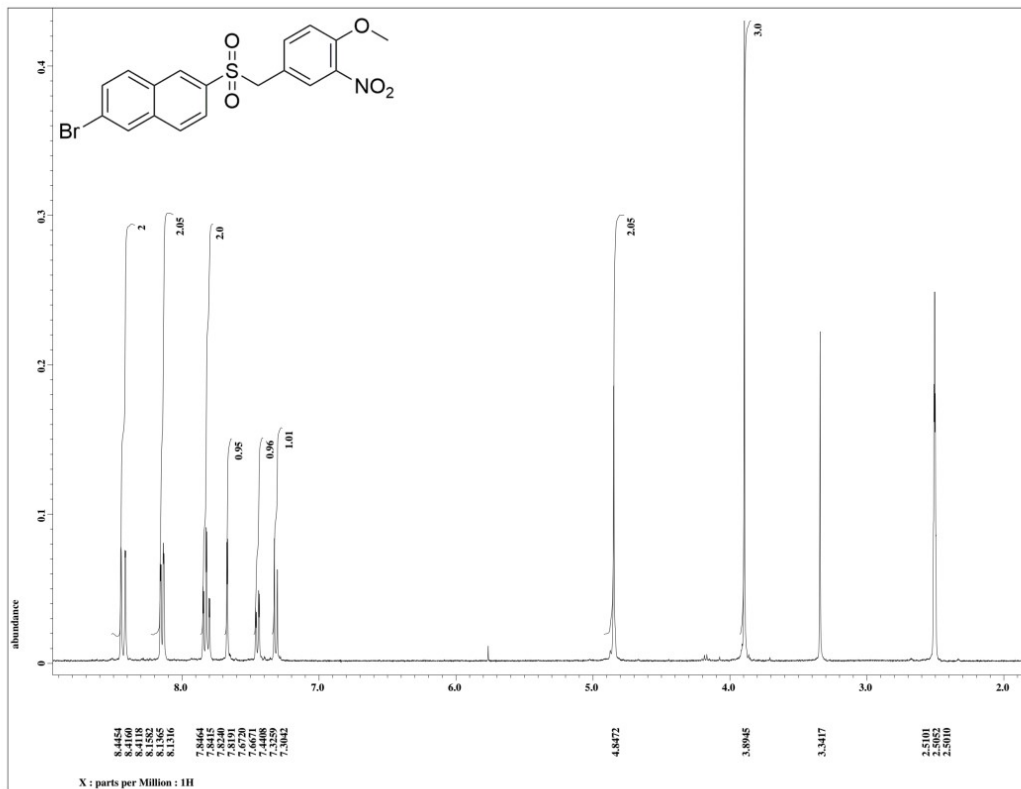

<sup>1</sup>H-NMR of Compound 11d

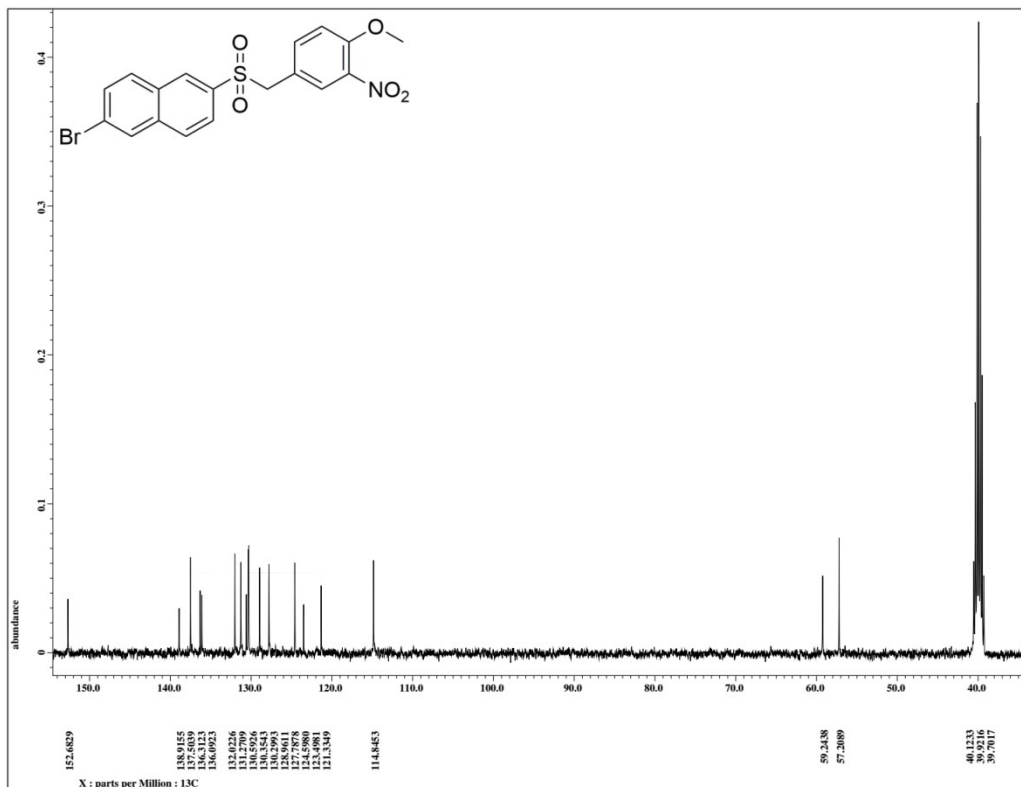

<sup>13</sup>C-NMR of Compound 11d



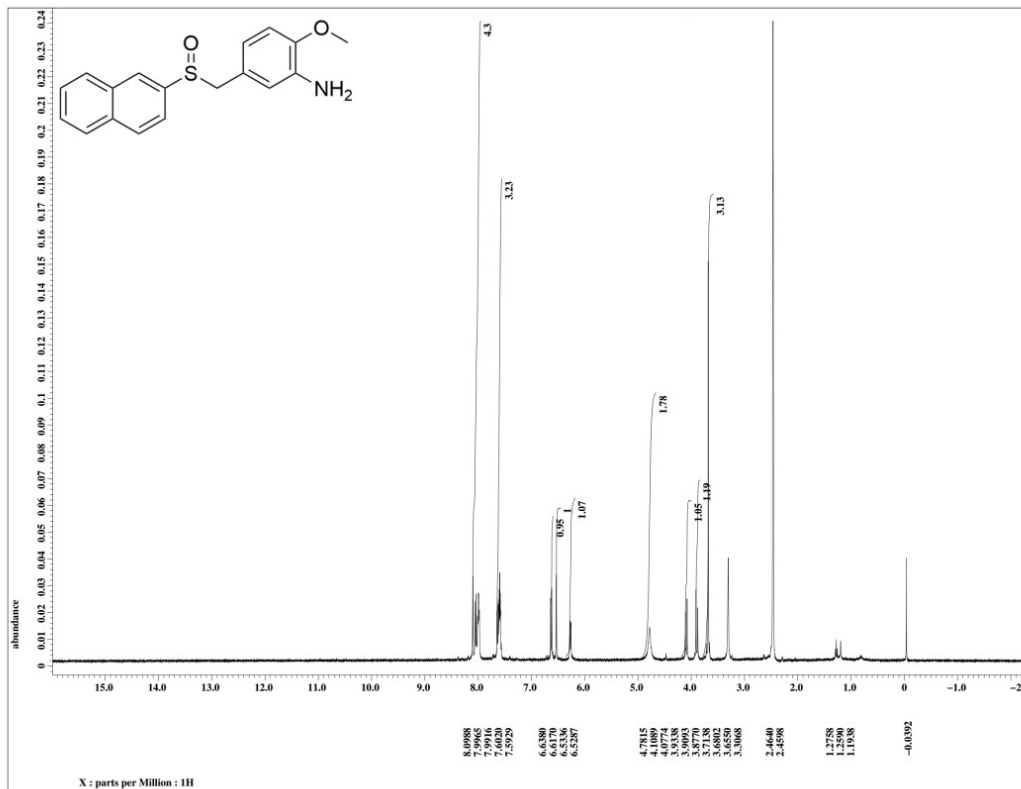

<sup>1</sup>H-NMR of Compound 12a

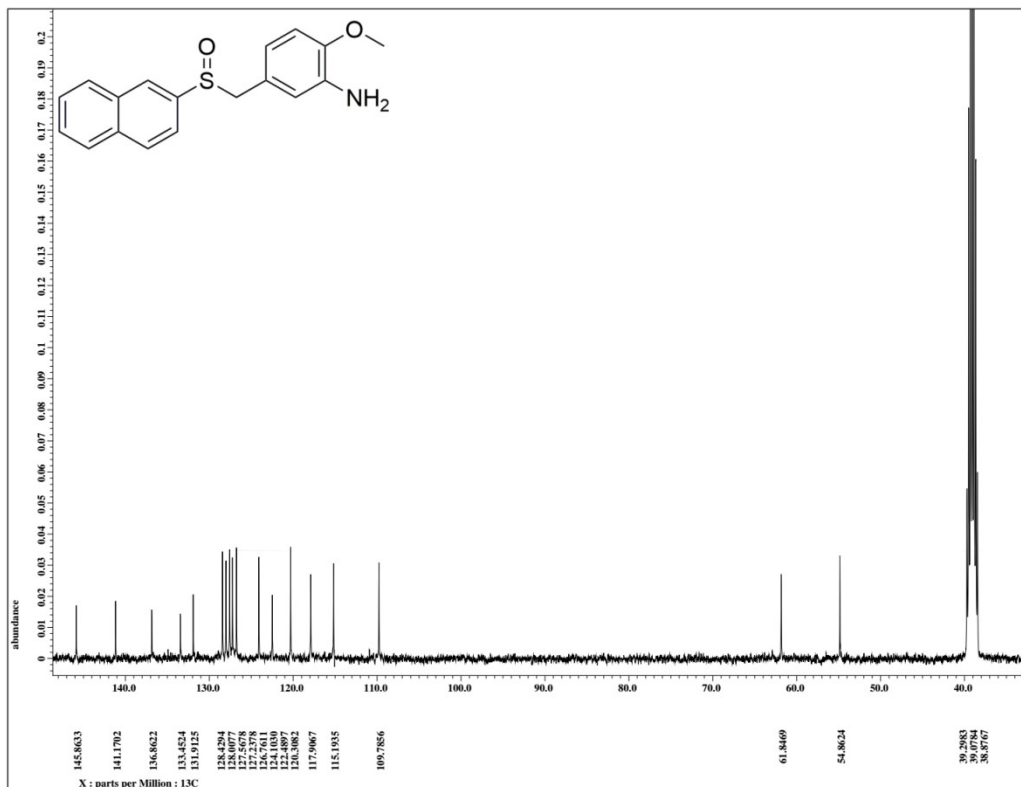

<sup>13</sup>C-NMR of Compound 12a

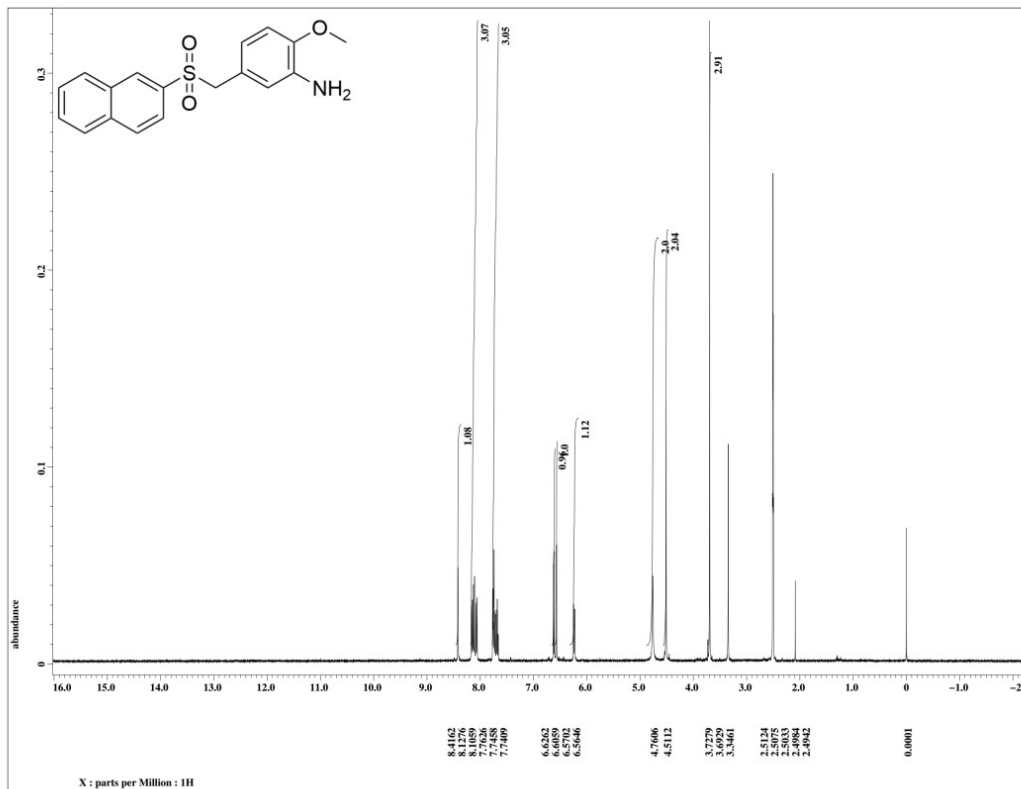

**<sup>1</sup>H-NMR of Compound 12b**

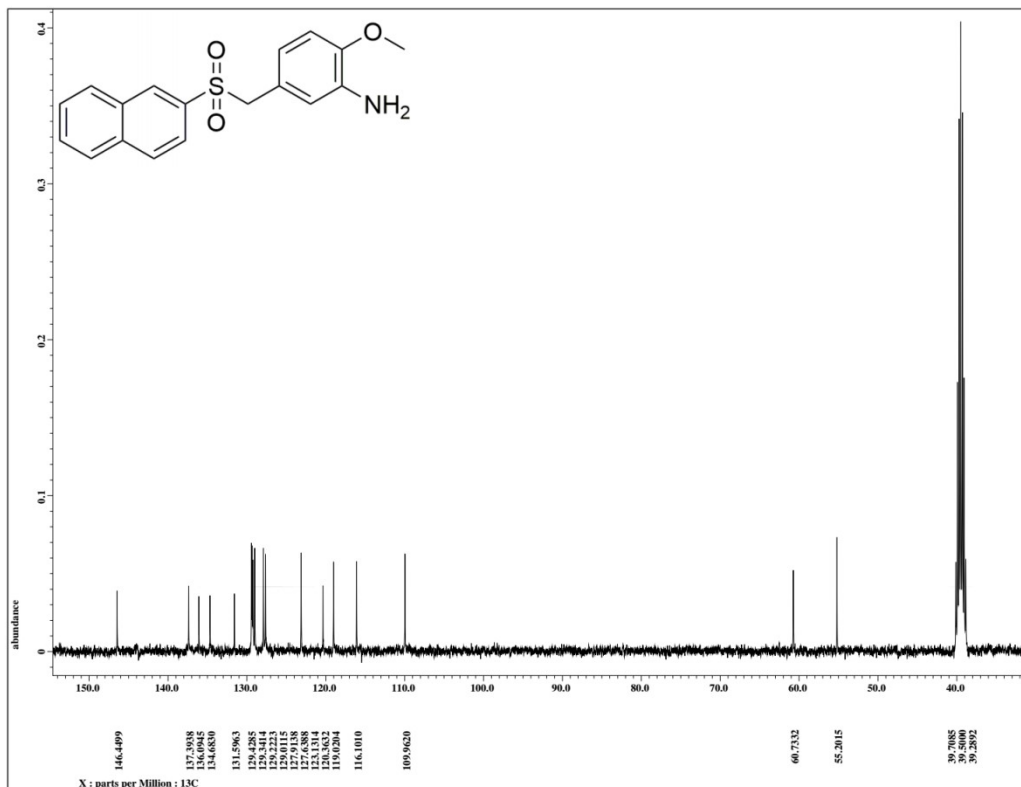

**<sup>13</sup>C-NMR of Compound 12b**

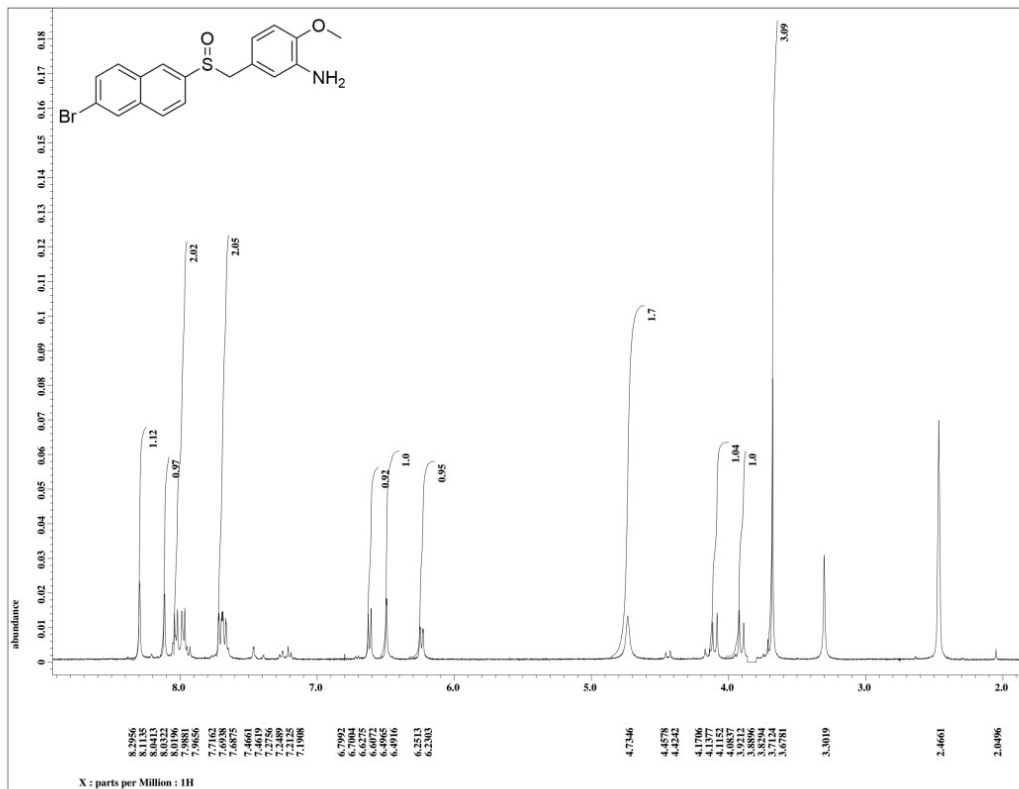

<sup>1</sup>H-NMR of Compound 12c

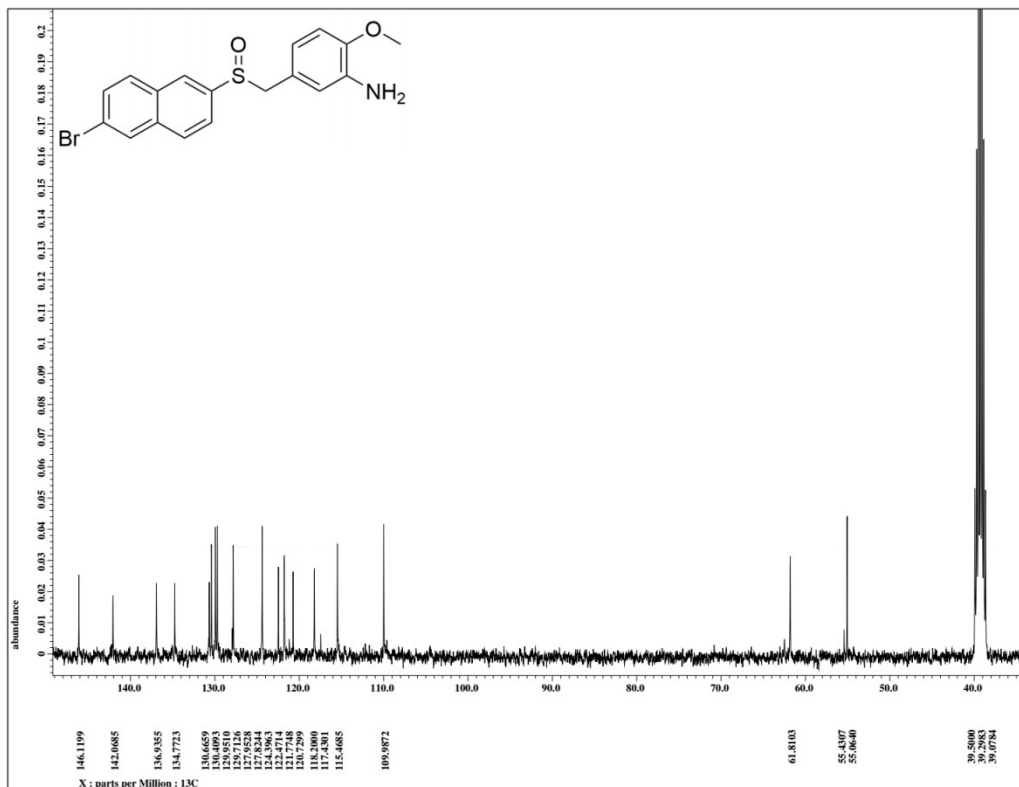

<sup>13</sup>C-NMR of Compound 12c

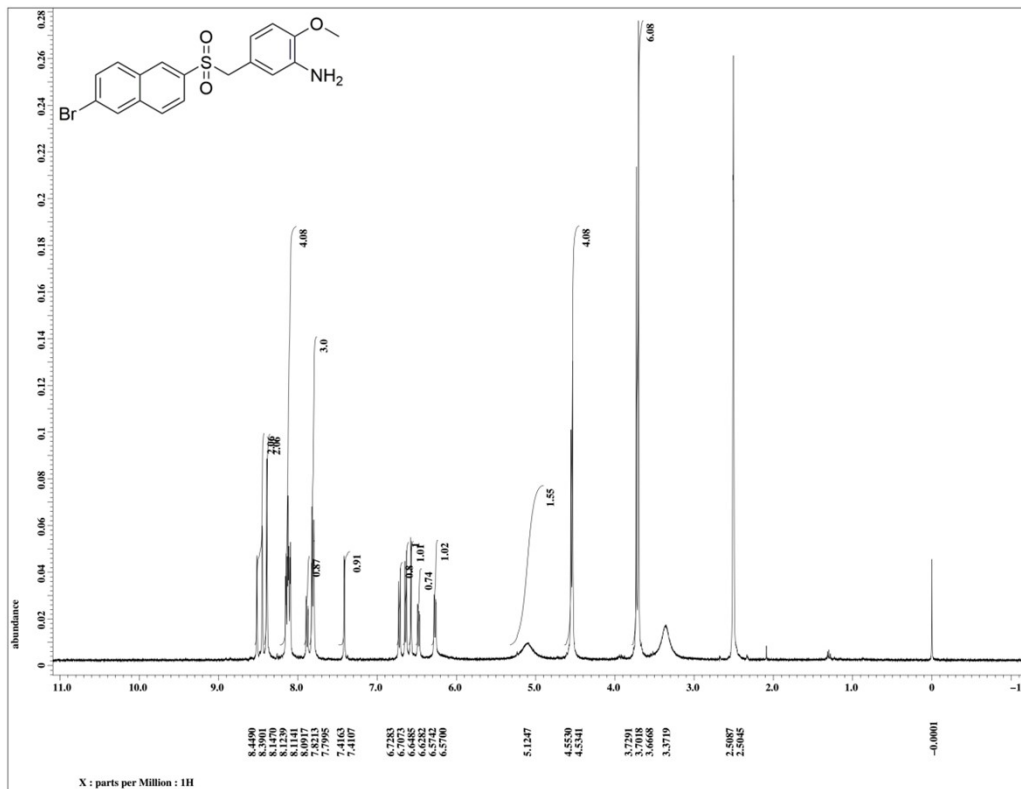

<sup>1</sup>H-NMR of Compound 12d

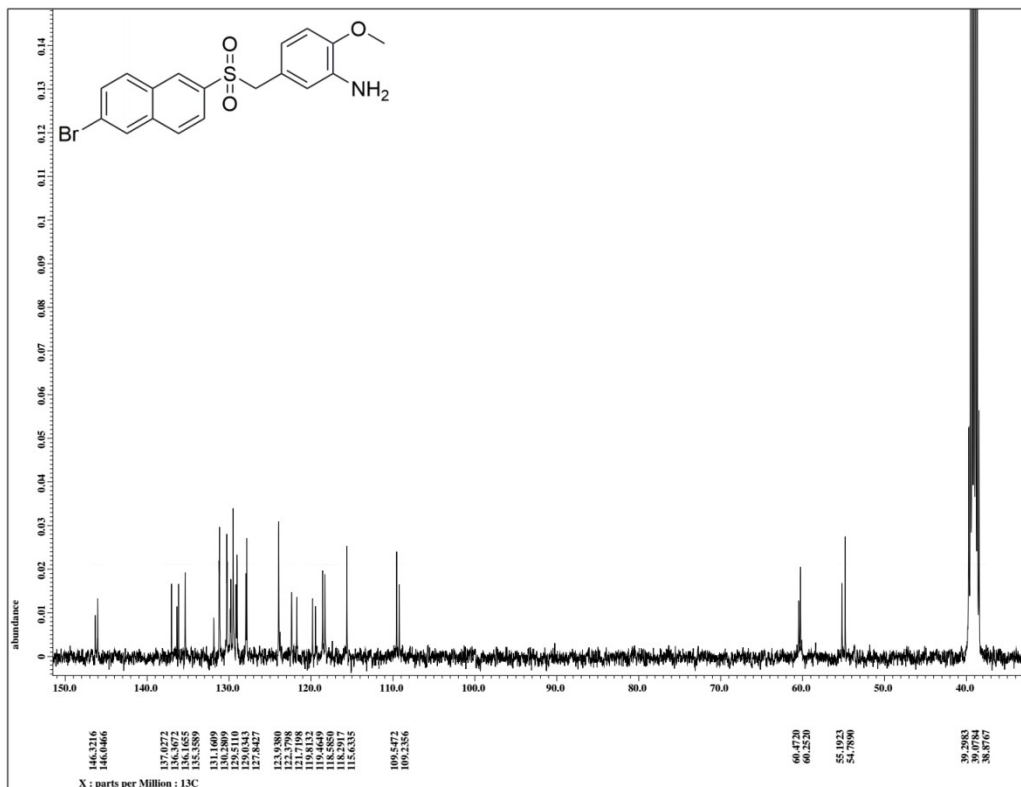

<sup>13</sup>C-NMR of Compound 12d

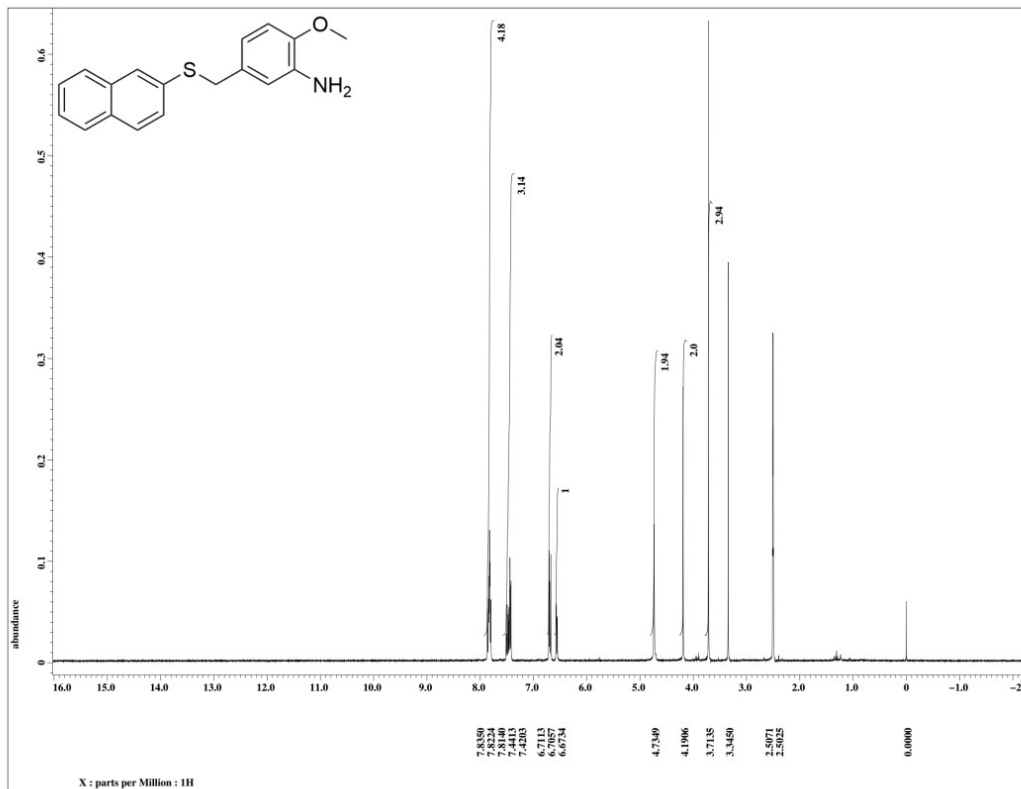

<sup>1</sup>H-NMR of Compound 12e

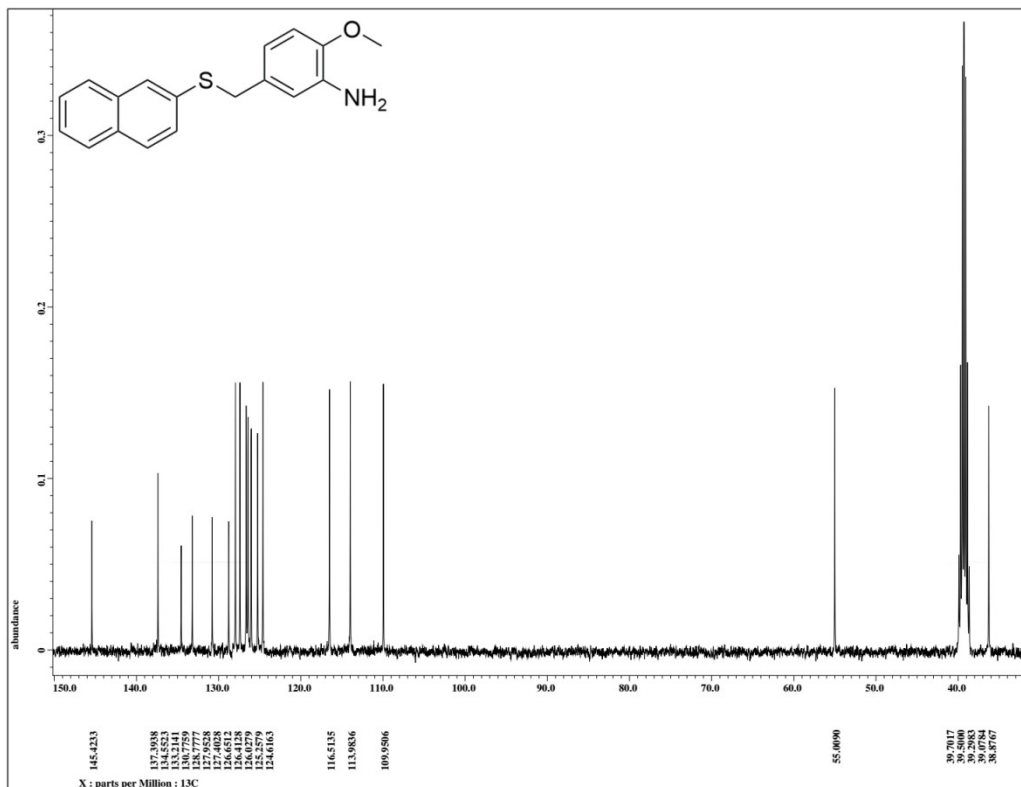

<sup>13</sup>C-NMR of Compound 12e



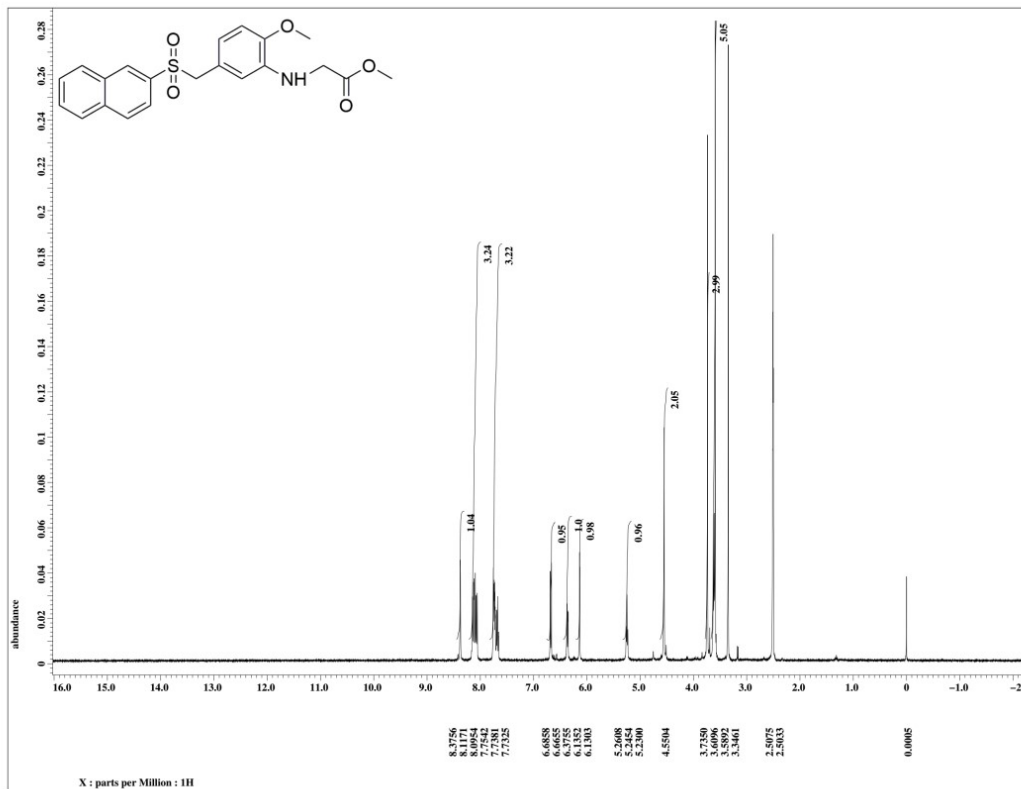

**<sup>1</sup>H-NMR of Compound 13b**

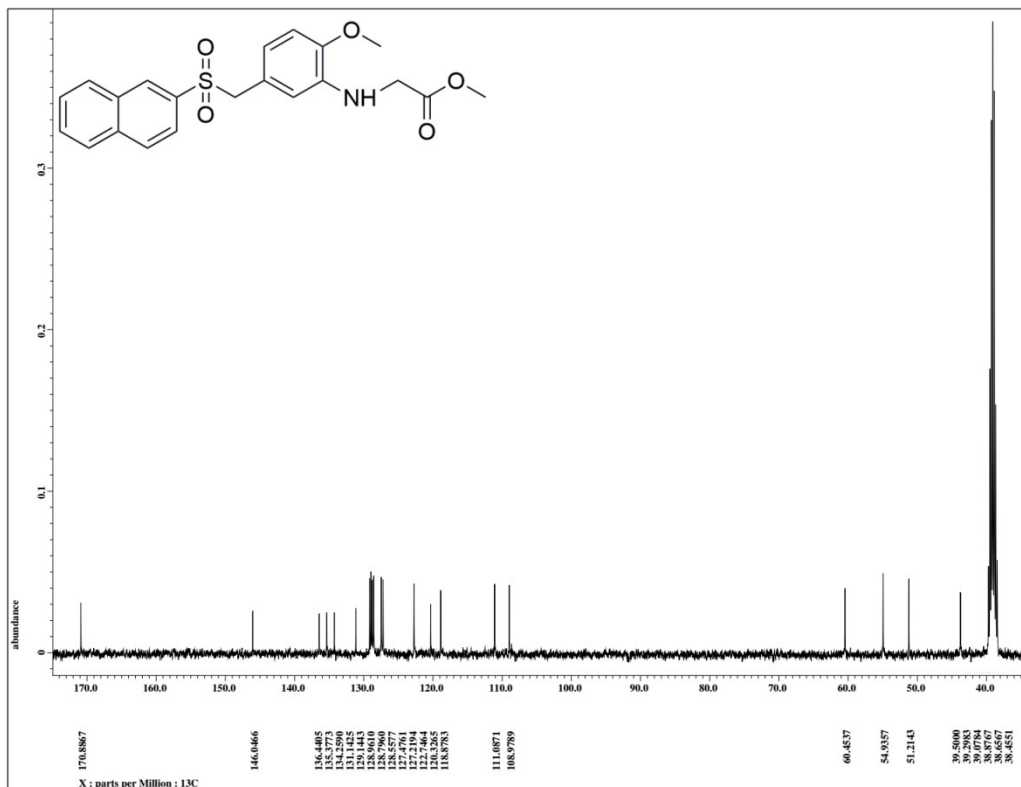

**<sup>13</sup>C-NMR of Compound 13b**

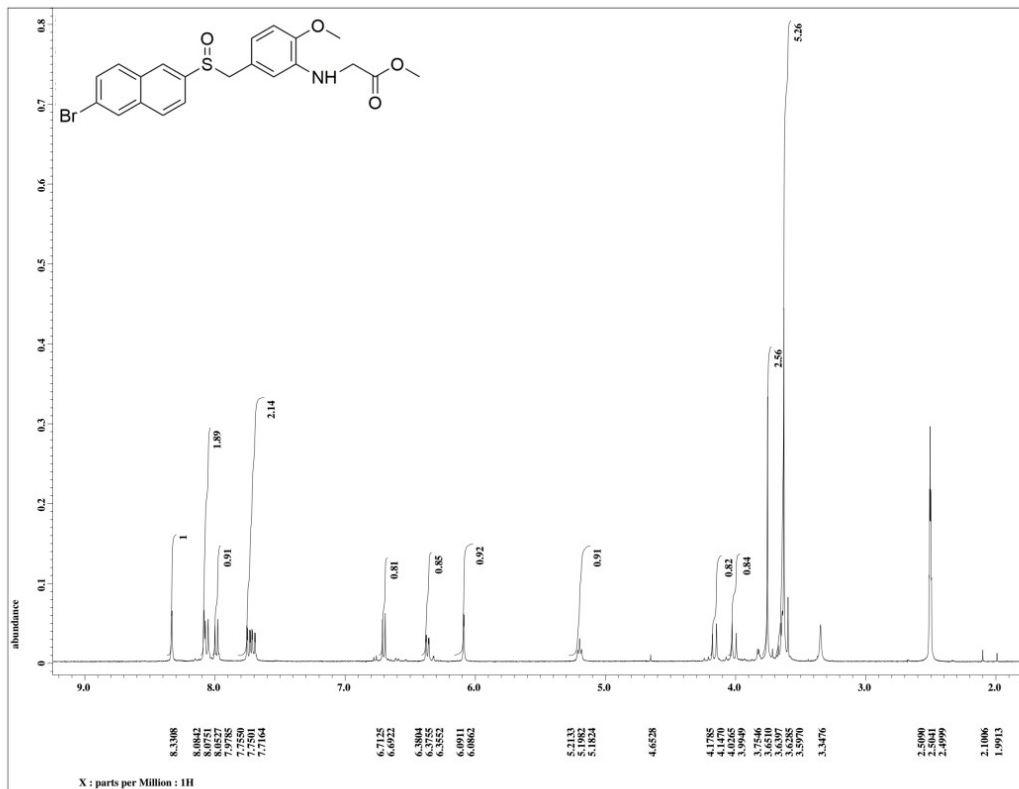

**<sup>1</sup>H-NMR of Compound 13c**

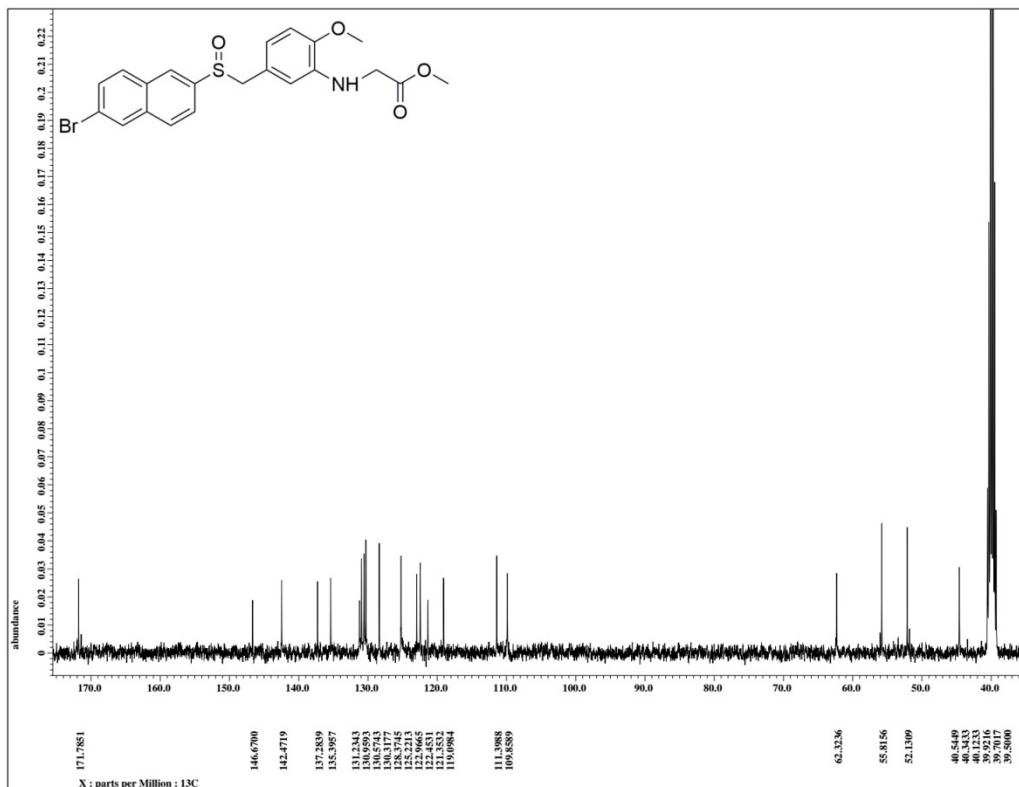

**<sup>13</sup>C-NMR of Compound 13c**



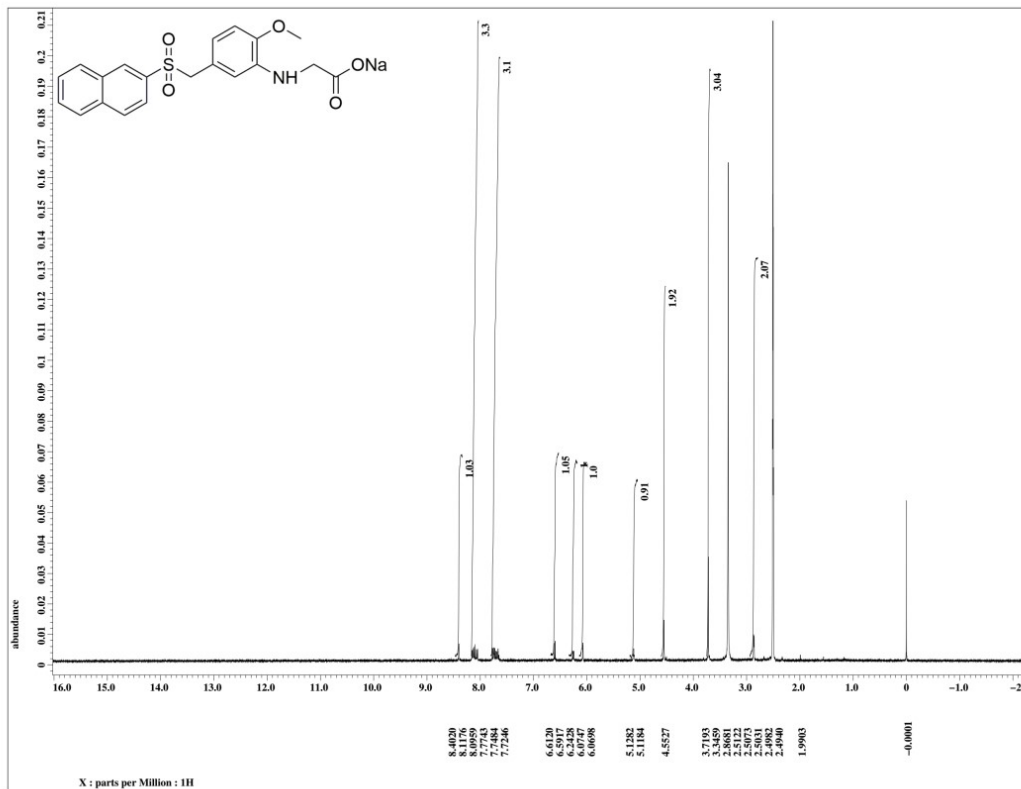

**<sup>1</sup>H-NMR of Compound 14b**

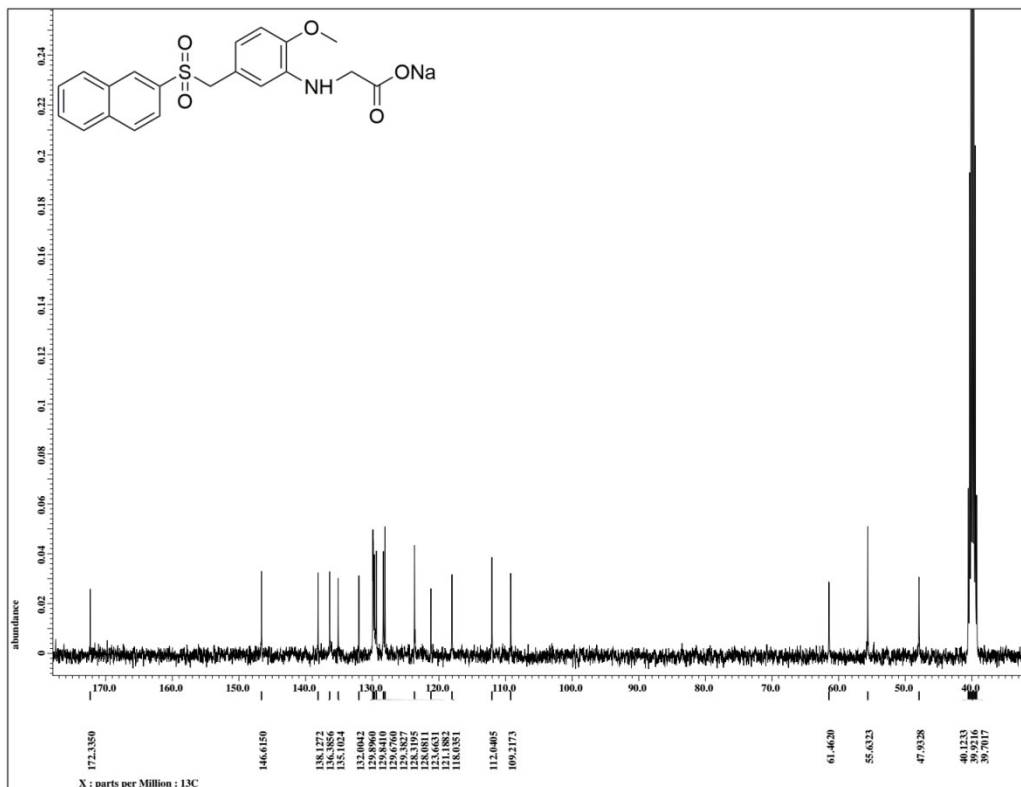

**<sup>13</sup>C-NMR of Compound 14b**

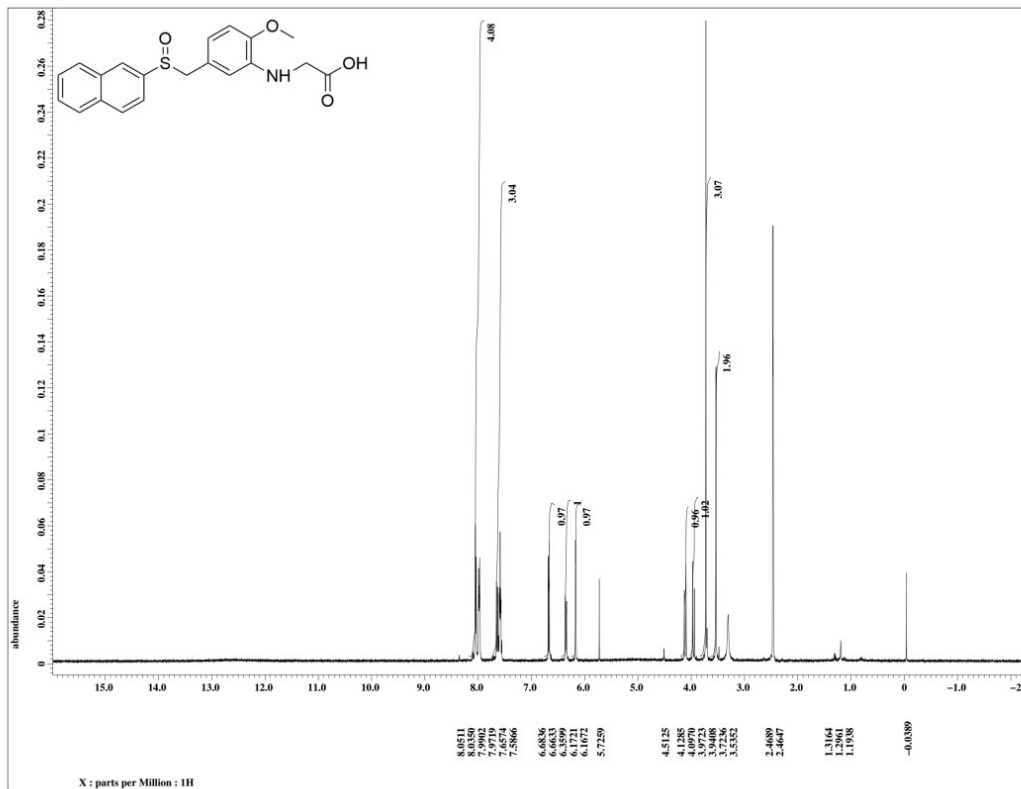

**<sup>1</sup>H-NMR of Compound 15a**

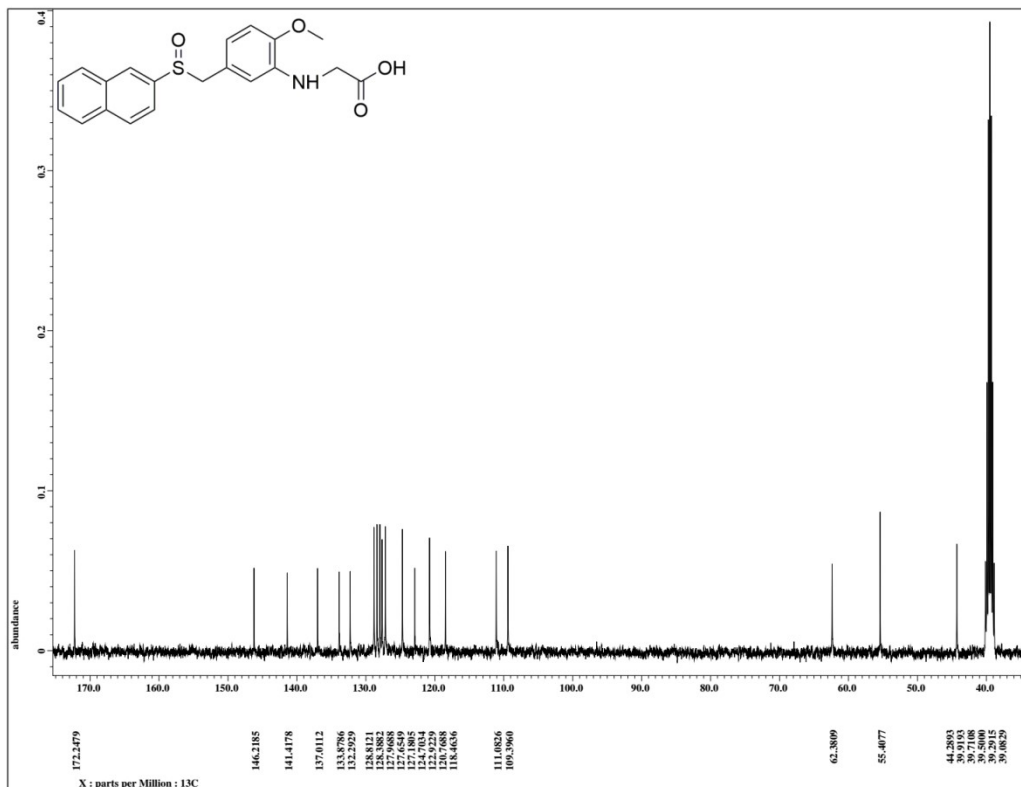

**<sup>13</sup>C-NMR of Compound 15a**

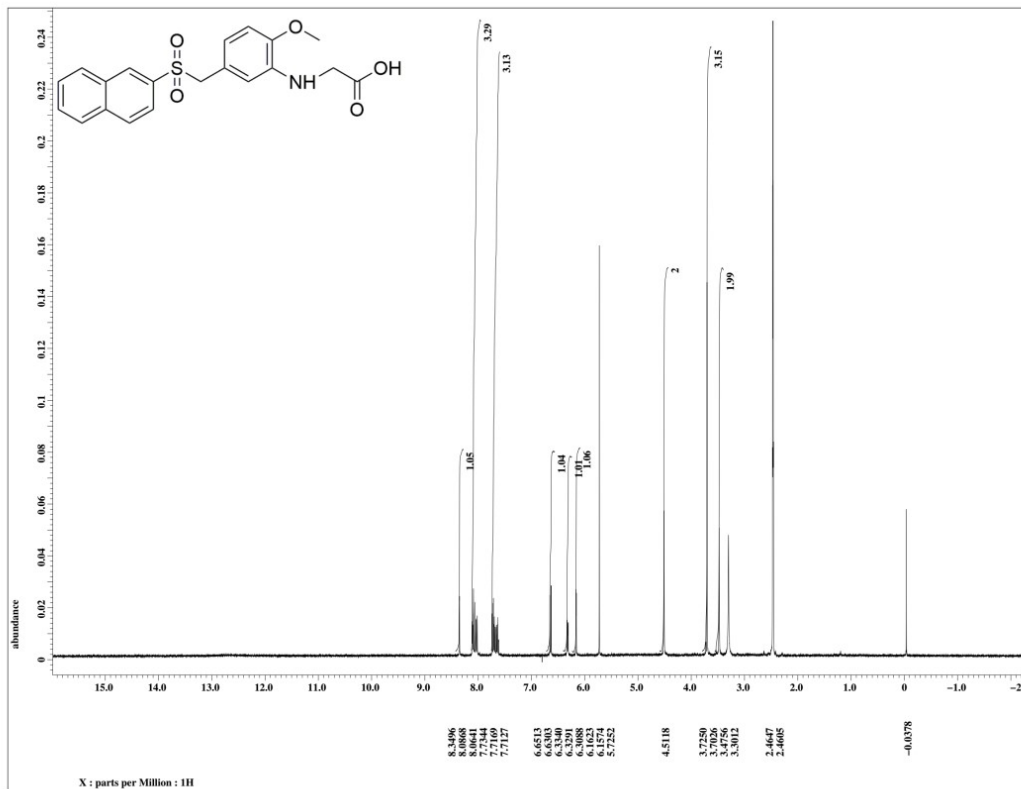

**<sup>1</sup>H-NMR of Compound 15b**

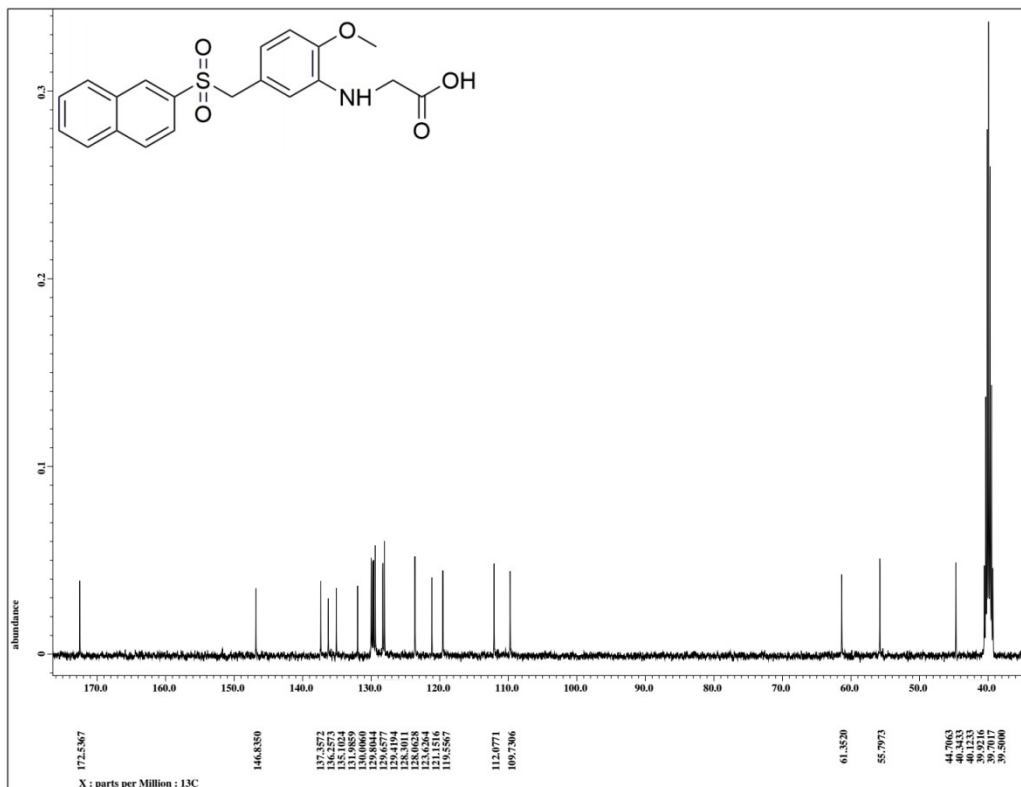

**<sup>13</sup>C-NMR of Compound 15b**
