# Supplementary figures and images for: Synthesis and antitumor effects of novel benzyl naphthyl sulfoxide/sulfone derivatives derived from Rigosertib
Source: Royal Society of Chemistry journal article supplement (doi:10.1039/d1ra05226h), 2021-01-01

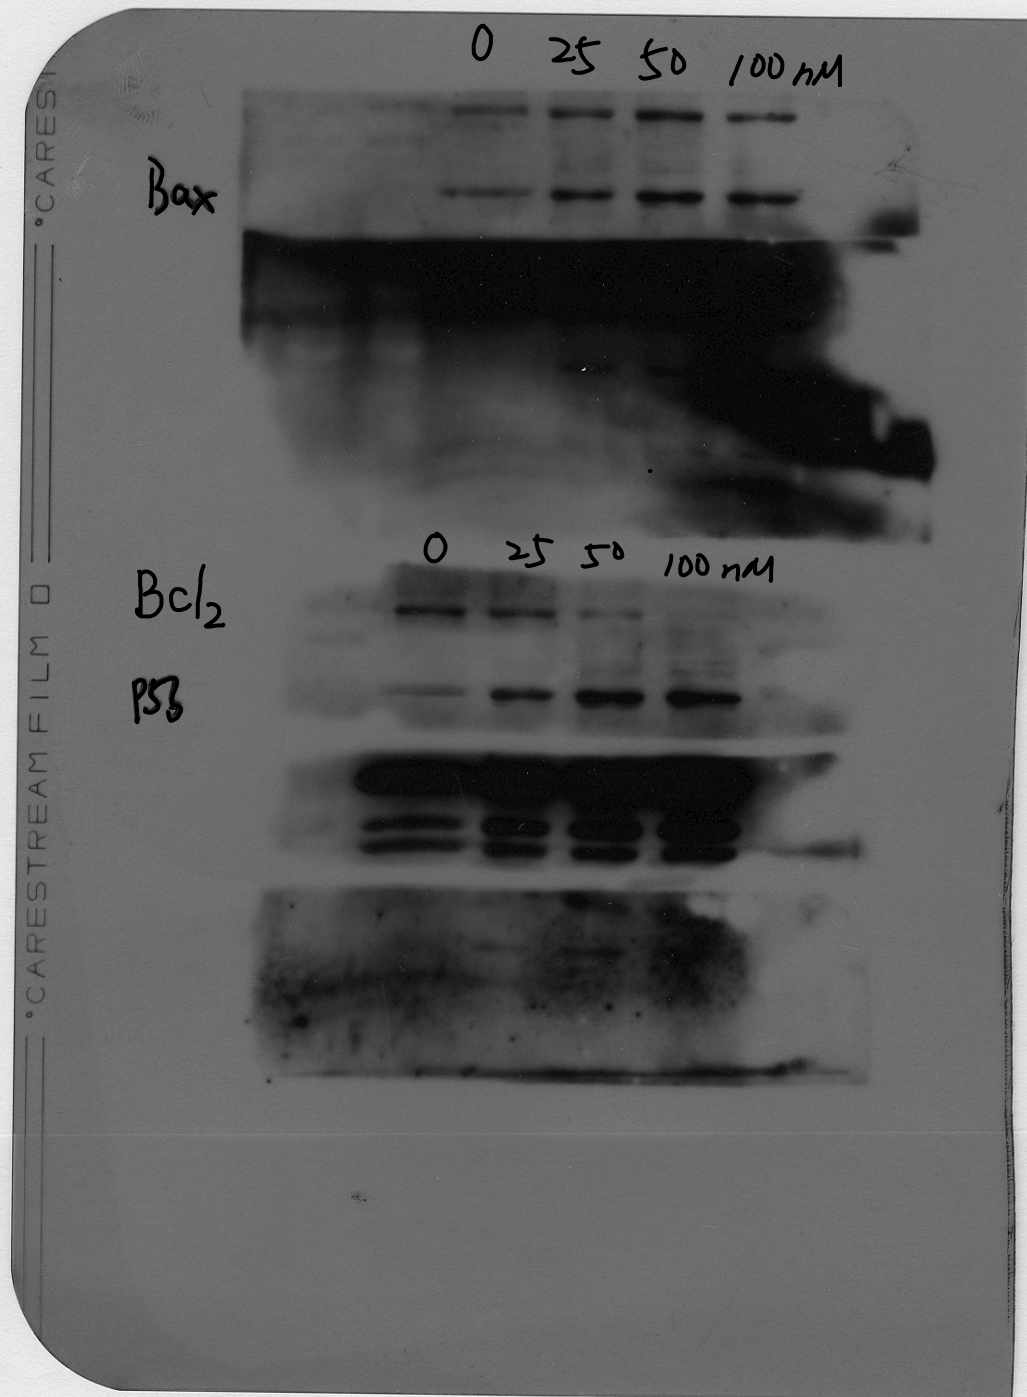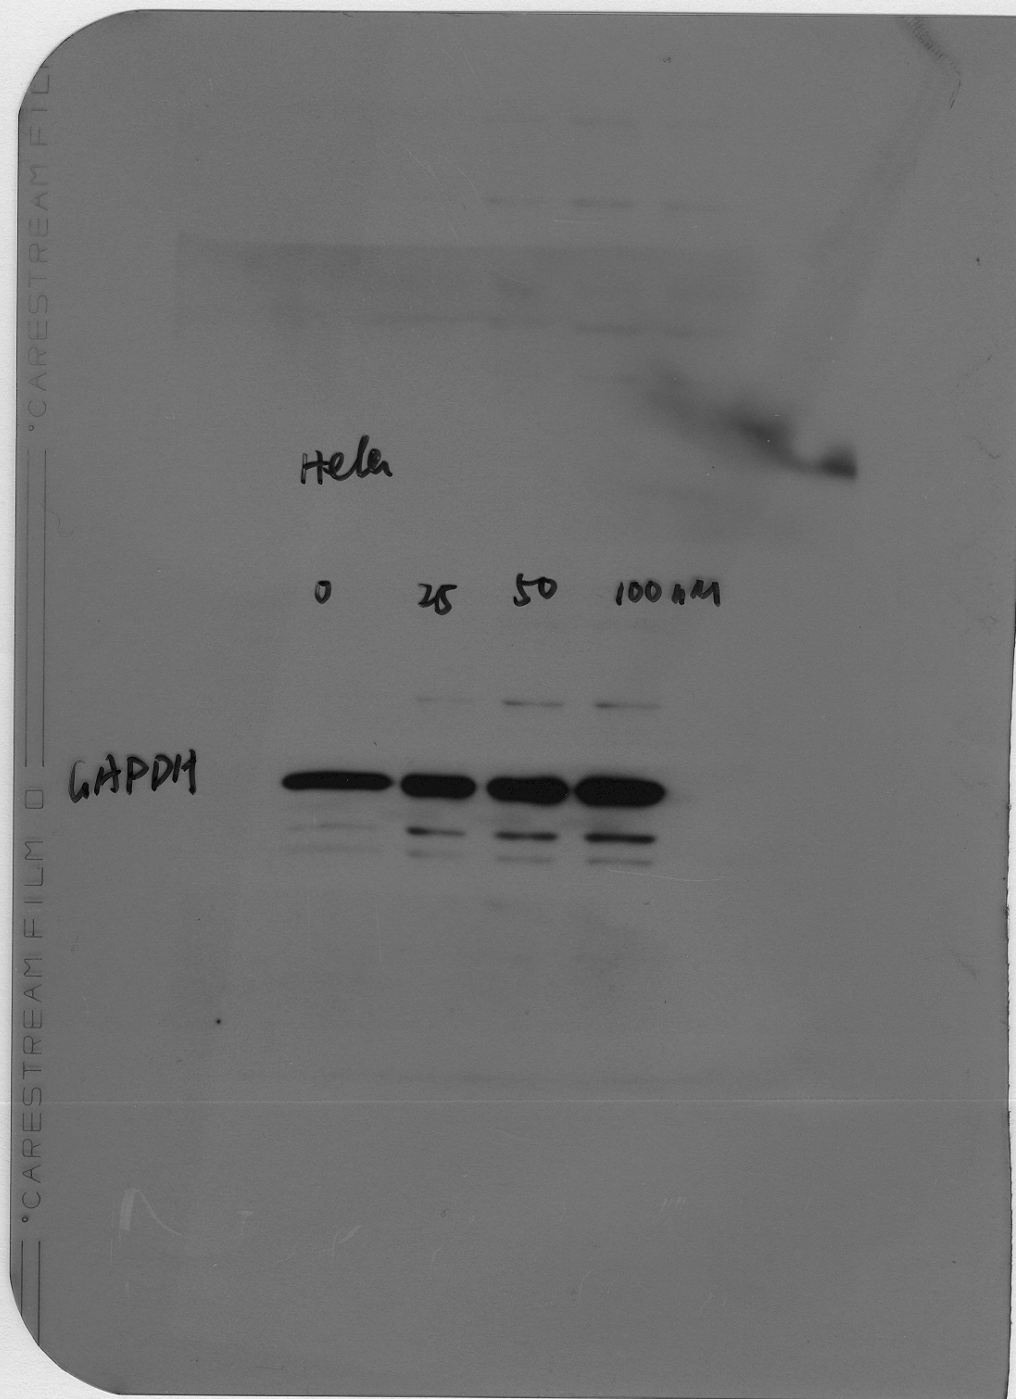

Supplement: d1ra05226h2.pdf [file d1ra05226h2.pdf]
